# Supplementary material
Source: Springer Nature journal article supplement (https://cannabishub.eu/wp-content/uploads/2026/04/42238_2026_412_MOESM1_ESM.zip)
Supplement: MOESM1 [file Figure S2 revised.pdf › Figure S2 revised.pdf]

Supplementary Figure S2

**A**

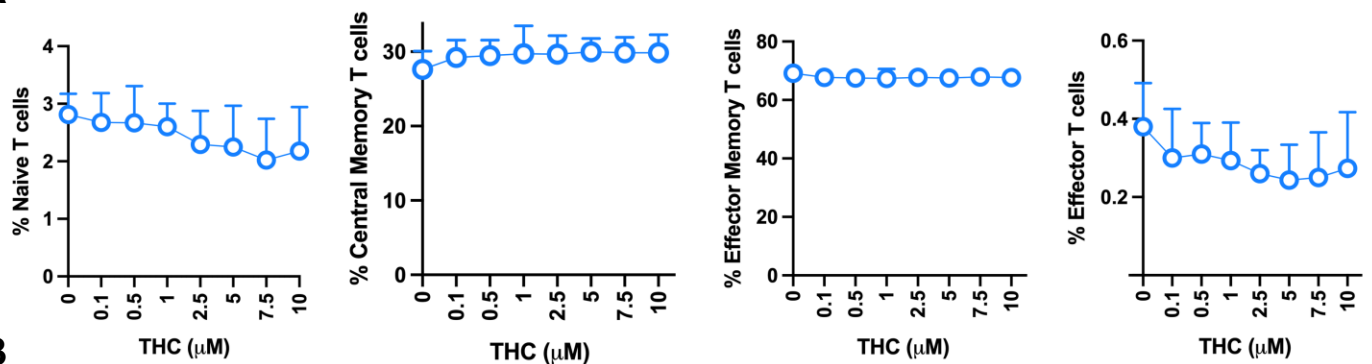

**B**

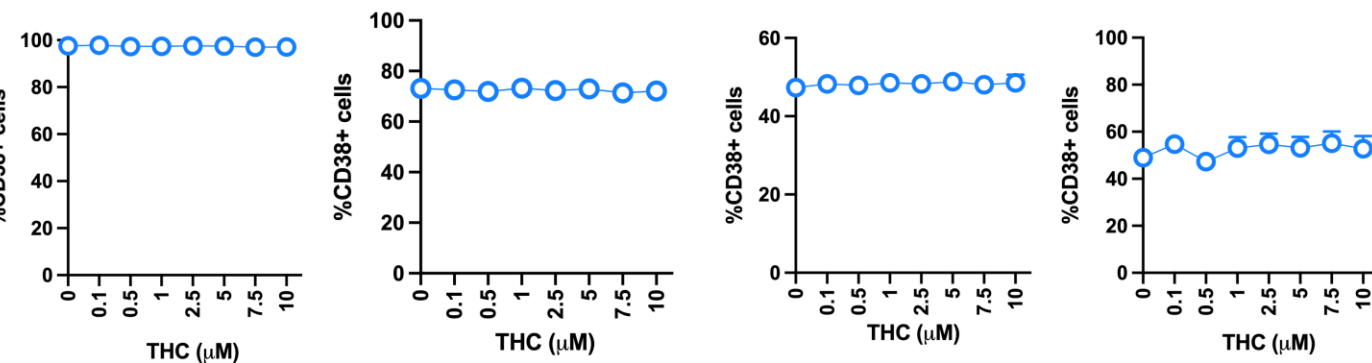

**C**

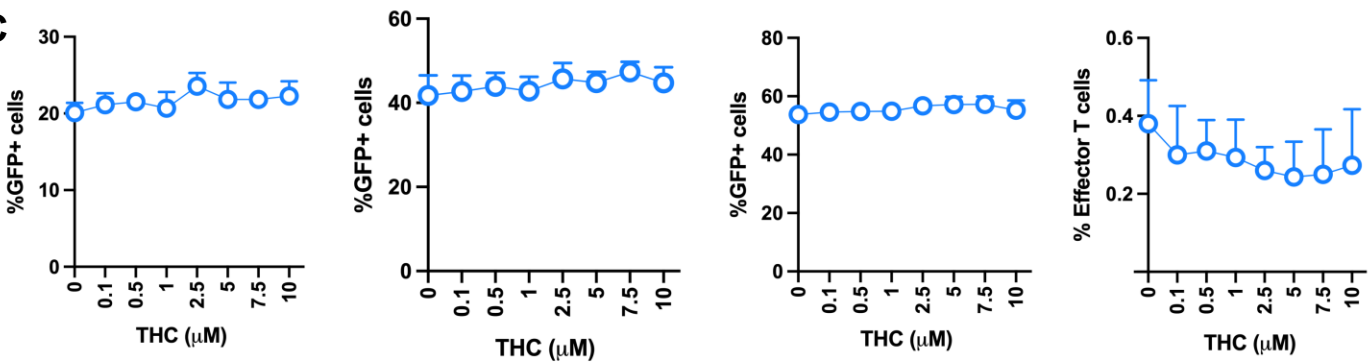

Naïve T Cells

Central memory T Cells

Effector memory T Cells

Effector T Cells
