# Supplementary material
Source: Springer Nature journal article supplement (https://cannabishub.eu/wp-content/uploads/2026/04/42238_2026_412_MOESM1_ESM.zip)

Supplementary Figure S1

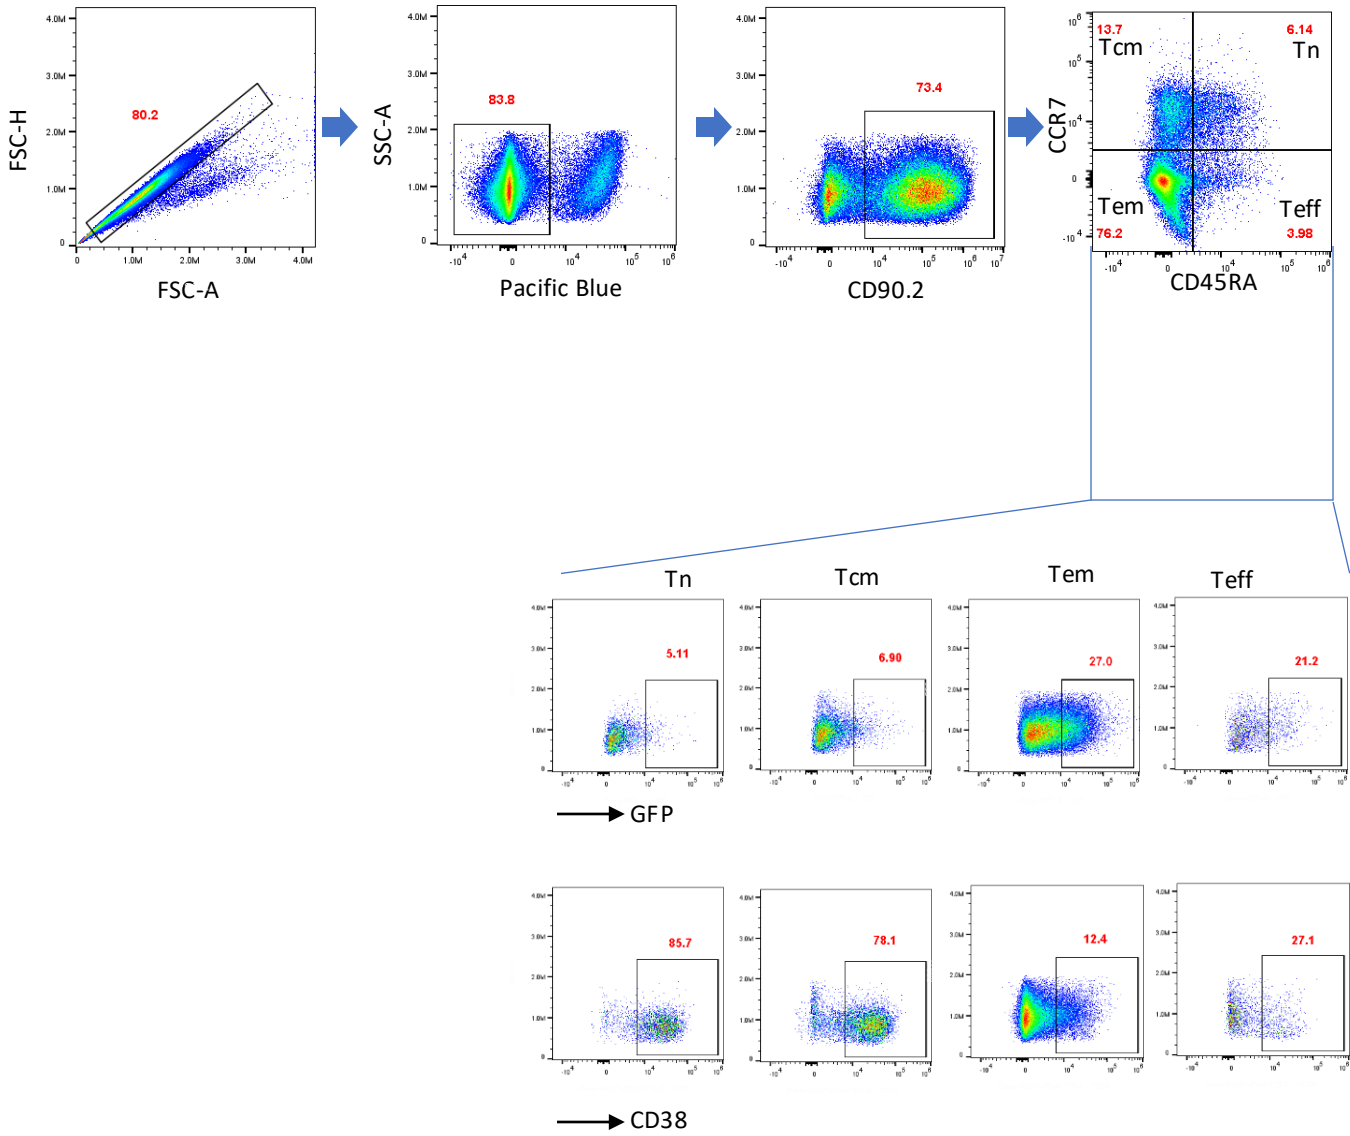

Supplement: MOESM1 [file Figure S1 revised.pdf › Figure S1 revised.pdf]

**Supplementary Figure S3**

**A**

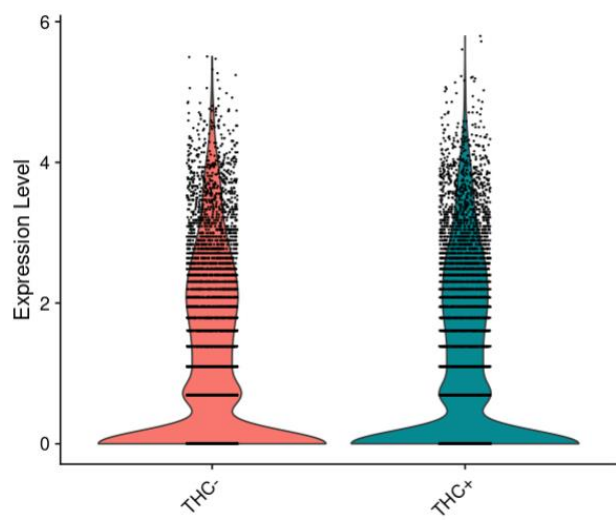

**B**

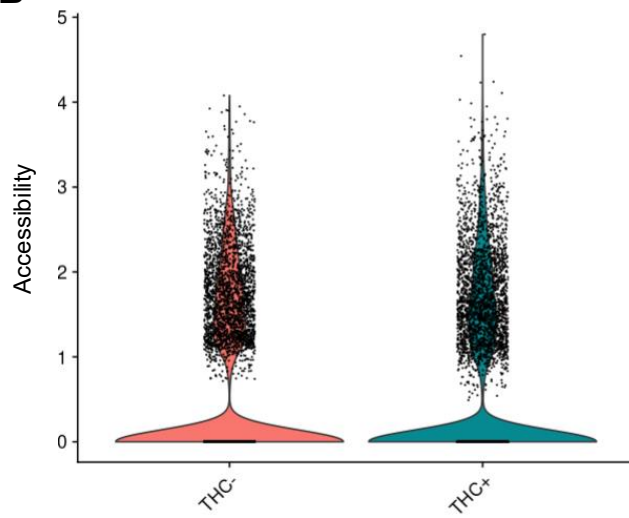

Supplement: MOESM1 [file Figure S3 revised.pdf › Figure S3 revised.pdf]
